# Supplementary material
Source: ML conference proceedings conference paper supplement (https://openreview.net/forum?id=u0geEr7X2O)
Supplement: supplementary_material [file attachment]

## A IMPLEMENTATION DETAILS OF MADIFF

We summarize the training procedure of VQ-MAGAN and de-noising U-net of MADIFF as Algorithm 1 and Algorithm 2. Following [15], we use the DDIM [58] sampler, which has been shown to achieve sampling quality on par with the full original sampling method, but with fewer steps. And we summarize the MA-SAMPLING and the corresponding DDIM [58] procedure of MADIFF as Algorithm 3 and Algorithm 4. And the differences from the original procedure are highlighted in blue.

### A.1 Training procedure of VQ-MAGAN

We update the parameters of the encoder  $\mathcal{E}$  and the decoder  $\mathcal{D}$  by using the loss function consists of an LPIPS-based [77] perceptual loss, a patch-based adversarial loss [27] and a latent regularization term based on a vector quantization (VQ) layer [66] following [15]. More details please refer to the Algorithm 1.

---

#### Algorithm 1 Training procedure of VQ-MAGAN

---

- 1: **Input:** dataset  $\mathcal{D} = \{I_{-1}^s, I_{+1}^s, I_0^s\}_{s=1}^S$  of consecutive frame triplets
  - 2: **Load:** the pre-trained EventGAN [80]  $f_{I2E}(\cdot)$
  - 3: **Initialize:** The encoder  $\mathcal{E}$  and the decoder  $\mathcal{D}$  of VQ-MAGAN
  - 4: **repeat**
  - 5:   Sample  $(I_{-1}, I_{+1}, I_0) \sim \mathcal{D}$
  - 6:   Encode  $z_0 = \mathcal{E}(I_0)$ ,  $z_{-1} = \mathcal{E}(I_{-1})$ ,  $z_{+1} = \mathcal{E}(I_{+1})$  and store features  $\phi_{-1}, \phi_{+1}$  extracted by  $\mathcal{E}$
  - 7:   Obtain inter-frame motion hints from the ground-truth target frame and neighboring frames as additional conditions by  $f_{I2E}(\cdot)$ :  
 $m_{-1 \rightarrow 0} = f_{I2E}(I_{-1}, I_0)$   
 $m_{0 \rightarrow +1} = f_{I2E}(I_0, I_{+1})$
  - 8:   Reconstruct the target frame:  
 $\hat{I}_0 = \mathcal{D}(z_0, \phi_{-1}, \phi_{+1}, m_{-1 \rightarrow 0}, m_{0 \rightarrow +1})$
  - 9:   Compute loss  $\mathcal{L}$  with  $\hat{I}_0$  and  $I_0$
  - 10:   Jointly update  $\mathcal{E}$  and  $\mathcal{D}$  by minimizing  $\mathcal{L}$
  - 11: **until** converged
- 

### A.2 Training procedure of MADIFF

---

#### Algorithm 2 Training procedure of MADIFF

---

- 1: **Input:** dataset  $\mathcal{D} = \{I_{-1}^s, I_{+1}^s, I_0^s\}_{s=1}^S$  of consecutive frame triplets, maximum diffusion step  $T$ , noise schedule  $\{\beta_t\}_{t=1}^T$ , learnable de-noising U-net  $\epsilon_\theta(\cdot)$
  - 2: **Load:** the encoder  $\mathcal{E}$  of the pre-trained VQ-MAGAN, the pre-trained EventGAN  $f_{I2E}(\cdot)$
  - 3: Compute  $\{\bar{\alpha}_t\}_{t=1}^T$  from  $\{\beta_t\}_{t=1}^T$
  - 4: **repeat**
  - 5:   Sample  $(I_{-1}, I_{+1}, I_0) \sim \mathcal{D}$
  - 6:   Encode  $z_{-1} = \mathcal{E}(I_{-1})$ ,  $z_{+1} = \mathcal{E}(I_{+1})$ ,  $z_0 = \mathcal{E}(I_0)$
  - 7:   Sample  $t \sim \mathcal{U}(1, T)$
  - 8:   Sample  $\epsilon \sim \mathcal{N}(\mathbf{0}, \mathbf{I})$
  - 9:    $z_t^n = \sqrt{\bar{\alpha}_t} z^n + \sqrt{1 - \bar{\alpha}_t} \epsilon$
  - 10:   Obtain inter-frame motion hints from the ground-truth target frame and neighboring frames as additional conditions by  $f_{I2E}(\cdot)$ :  
 $m_{-1 \rightarrow 0} = f_{I2E}(I_{-1}, I_0)$   
 $m_{0 \rightarrow +1} = f_{I2E}(I_0, I_{+1})$
  - 11:   Take a gradient descent step on:  
 $\nabla_\theta \|\epsilon - \epsilon_\theta(z_t^n, t, z^0, z^1, m_{-1 \rightarrow 0}, m_{0 \rightarrow +1})\|^2$
  - 12: **until** converged
- 

### A.3 MA-SAMPLING procedure of MADIFF

---

#### Algorithm 3 MA-SAMPLING procedure of MADIFF

---

- 1: **Input:** original frames  $I^0, I^1$ , noise schedule  $\{\beta_t\}_{t=1}^T$ , maximum diffusion step  $T$
  - 2: **Load:** pre-trained de-noising U-net  $\epsilon_\theta$ , the encoder  $\mathcal{E}$  and the decoder  $\mathcal{D}$  of VQ-MAGAN, the pre-trained EventGAN  $f_{I2E}(\cdot)$
  - 3: Compute  $\{\bar{\alpha}_t\}_{t=1}^T$  from  $\{\beta_t\}_{t=1}^T$
  - 4: Sample  $\hat{z}_T \sim \mathcal{N}(\mathbf{0}, \mathbf{I})$
  - 5: Encode  $z_{-1} = \mathcal{E}(I_{-1})$ ,  $z_{+1} = \mathcal{E}(I_{+1})$  and store features  $\phi_{-1}, \phi_{+1}$  extracted by  $\mathcal{E}$
  - 6: **Let**  $\hat{m}_{-1 \rightarrow 0|T+1} = \mathbf{O}$  and  $\hat{m}_{0 \rightarrow +1|T+1} = \mathbf{O}$
  - 7: **for**  $t = T, \dots, 1$  **do**
  - 8:   Predict noise:  
 $\hat{\epsilon} = \epsilon_\theta(\hat{z}_t, t, z_{-1}, z_{+1}, \hat{m}_{-1 \rightarrow 0|t+1}, \hat{m}_{0 \rightarrow +1|t+1})$
  - 9:   Predict  $\hat{z}_{0|t}$  from noise:  
 $\hat{z}_{0|t} = \frac{1}{\sqrt{\bar{\alpha}_t}}(\hat{z}_t - \frac{1-\alpha_t}{\sqrt{1-\bar{\alpha}_t}}\hat{\epsilon})$
  - 10:   Reconstruct the interpolated frame  
 $\hat{I}_{0|t} = \mathcal{D}(\hat{z}_{0|t}, \phi_{-1}, \phi_{+1}, \hat{m}_{-1 \rightarrow 0|t+1}, \hat{m}_{0 \rightarrow +1|t+1})$
  - 11:   Update extracted inter-frame motion hints  
 $\hat{m}_{-1 \rightarrow 0|t} = f_{I2E}(I_{-1}, \hat{I}_{0|t})$   
 $\hat{m}_{0 \rightarrow +1|t} = f_{I2E}(\hat{I}_{0|t}, I_{+1})$
  - 12:    $\sigma_t^2 = \bar{\beta}_t$
  - 13:   Sample  $\zeta \sim \mathcal{N}(\mathbf{0}, \mathbf{I})$
  - 14:    $\hat{z}_{t-1} = \hat{z}_{0|t} + \sigma_t \zeta$
  - 15: **end for**
  - 16: **return**  $\hat{I}_{0|1} = \mathcal{D}(\hat{z}_{0|1}, \phi_{-1}, \phi_{+1}, \hat{m}_{-1 \rightarrow 0|1}, \hat{m}_{0 \rightarrow +1|1})$  as the final interpolated frame
- 

---

#### Algorithm 4 DDIM Sampler of MA-SAMPLING

---

- 1: **Input:** original frames  $I_{-1}, I_{+1}$ , noise schedule  $\{\beta_t\}_{t=1}^T$ , maximum DDIM step  $\mathcal{T}$
  - 2: **Load:** pre-trained de-noising U-net  $\epsilon_\theta$ , the encoder  $\mathcal{E}$  and the decoder  $\mathcal{D}$ , the pre-trained EventGAN  $f_{I2E}(\cdot)$
  - 3: Compute  $\{\bar{\alpha}_t\}_{t=1}^T$  from  $\{\beta_t\}_{t=1}^T$
  - 4: Sample  $\hat{z}_T \sim \mathcal{N}(\mathbf{0}, \mathbf{I})$
  - 5: Encode  $z_{-1} = \mathcal{E}(I_{-1})$ ,  $z_{+1} = \mathcal{E}(I_{+1})$  and store features  $\phi_{-1}, \phi_{+1}$  extracted by  $\mathcal{E}$
  - 6: **Let**  $\hat{m}_{-1 \rightarrow 0|T+1} = \mathbf{O}$  and  $\hat{m}_{0 \rightarrow +1|T+1} = \mathbf{O}$
  - 7: **for**  $t = T, \dots, 1$  **do**
  - 8:   Predict noise:  
 $\hat{\epsilon} = \epsilon_\theta(\hat{z}_t, t, z_{-1}, z_{+1}, \hat{m}_{-1 \rightarrow 0|t+1}, \hat{m}_{0 \rightarrow +1|t+1})$
  - 9:   Predict  $\hat{z}_{0|t}$  from noise:  
 $\hat{z}_{0|t} = \frac{1}{\sqrt{\bar{\alpha}_t}}(\hat{z}_t - \sqrt{1 - \bar{\alpha}_t}\hat{\epsilon})$
  - 10:   Predict  $\hat{z}_{0|t}$  from noise:  
 $\hat{z}_{0|t} = \frac{1}{\sqrt{\bar{\alpha}_t}}(\hat{z}_t - \frac{1-\alpha_t}{\sqrt{1-\bar{\alpha}_t}}\hat{\epsilon})$
  - 11:   Reconstruct the interpolated frame  
 $\hat{I}_{0|t} = \mathcal{D}(\hat{z}_{0|t}, \phi_{-1}, \phi_{+1}, \hat{m}_{-1 \rightarrow 0|t+1}, \hat{m}_{0 \rightarrow +1|t+1})$
  - 12:   Update extracted inter-frame motion hints  
 $\hat{m}_{-1 \rightarrow 0|t} = f_{I2E}(I_{-1}, \hat{I}_{0|t})$   
 $\hat{m}_{0 \rightarrow +1|t} = f_{I2E}(\hat{I}_{0|t}, I_{+1})$
  - 13:    $\hat{z}_{t-1} = \sqrt{\bar{\alpha}_{t-1}}\hat{z}_{0|t} + \sqrt{1 - \bar{\alpha}_{t-1}}\hat{\epsilon}$
  - 14: **end for**
  - 15: **return**  $\hat{I}_{0|1} = \mathcal{D}(\hat{z}_{0|1}, \phi_{-1}, \phi_{+1}, \hat{m}_{-1 \rightarrow 0|1}, \hat{m}_{0 \rightarrow +1|1})$  as the final interpolated frame
-

|               | Middlebury    |       |              |              |               | UCF-101       |       |              |              |               | DAVIS         |       |              |              |               |
|---------------|---------------|-------|--------------|--------------|---------------|---------------|-------|--------------|--------------|---------------|---------------|-------|--------------|--------------|---------------|
|               | PSNR↑         | SSIM↑ | LPIPS↓       | FloLPIPS↓    | FID↓          | PSNR↑         | SSIM↑ | LPIPS↓       | FloLPIPS↓    | FID↓          | PSNR↑         | SSIM↑ | LPIPS↓       | FloLPIPS↓    | FID↓          |
| BMBC          | <b>36.368</b> | 0.982 | 0.023        | <b>0.037</b> | 12.974        | 32.576        | 0.968 | 0.034        | 0.045        | 33.171        | 26.835        | 0.869 | 0.125        | 0.185        | 15.354        |
| AdaCoF        | 35.256        | 0.975 | 0.031        | 0.052        | 15.633        | 32.488        | 0.968 | 0.034        | 0.046        | 32.783        | 26.234        | 0.850 | 0.148        | 0.198        | 17.194        |
| CDFI          | 36.205        | 0.981 | 0.022        | 0.043        | 12.224        | 32.541        | 0.968 | 0.036        | 0.049        | 33.742        | 26.471        | 0.857 | 0.157        | 0.211        | 18.098        |
| XVFI          | 34.724        | 0.975 | 0.036        | 0.070        | 16.959        | 32.224        | 0.966 | 0.038        | 0.050        | 33.868        | 26.475        | 0.861 | 0.129        | 0.185        | 16.163        |
| ABME          | <b>37.639</b> | 0.986 | 0.027        | 0.040        | <b>11.393</b> | 32.055        | 0.967 | 0.058        | 0.069        | 37.066        | 26.861        | 0.865 | 0.151        | 0.209        | 16.931        |
| IFRNet        | <b>36.368</b> | 0.983 | 0.020        | 0.039        | 12.256        | 32.716        | 0.969 | 0.032        | 0.044        | 28.803        | <b>27.313</b> | 0.877 | 0.114        | 0.170        | 14.227        |
| VFIformer     | 35.566        | 0.977 | 0.031        | 0.065        | 15.634        | 32.745        | 0.968 | 0.039        | 0.051        | 34.112        | 26.241        | 0.850 | 0.191        | 0.242        | 21.702        |
| ST-MFNet      | N/A           | N/A   | N/A          | N/A          | N/A           | <b>33.384</b> | 0.970 | 0.036        | 0.049        | 34.475        | <b>28.287</b> | 0.895 | 0.125        | 0.181        | 15.626        |
| FLAVR         | N/A           | N/A   | N/A          | N/A          | N/A           | <b>33.224</b> | 0.969 | 0.035        | 0.046        | 31.449        | 27.104        | 0.862 | 0.209        | 0.248        | 22.663        |
| MCVD          | 20.539        | 0.820 | 0.123        | 0.138        | 41.053        | 18.775        | 0.710 | 0.155        | 0.169        | 102.054       | 18.946        | 0.705 | 0.247        | 0.293        | 28.002        |
| LDMVFI        | 34.033        | 0.971 | <b>0.019</b> | 0.044        | 16.167        | 32.186        | 0.963 | <b>0.026</b> | <b>0.035</b> | <b>26.301</b> | 25.541        | 0.833 | <b>0.107</b> | <b>0.153</b> | <b>12.554</b> |
| MADIFF w/o MS | 34.002        | 0.973 | <b>0.016</b> | <b>0.034</b> | 13.649        | 32.141        | 0.966 | <b>0.024</b> | <b>0.032</b> | <b>24.677</b> | 25.952        | 0.849 | <b>0.098</b> | <b>0.143</b> | <b>11.764</b> |
| MADIFF        | 34.170        | 0.974 | <b>0.016</b> | <b>0.034</b> | <b>11.678</b> | 32.159        | 0.966 | <b>0.024</b> | <b>0.033</b> | <b>24.289</b> | 26.069        | 0.853 | <b>0.096</b> | <b>0.142</b> | <b>11.089</b> |

**Table 6: Quantitative comparison of MADIFF ( $f = 32$ ) and 11 tested methods on Middlebury, UCF-101 and DAVIS. Note ST-MFNet and FLAVR require four input frames so cannot be evaluated on Middlebury dataset which contains frame triplets. For each column, we highlight the best result in **red** and the second best in **blue**.**

|               | SNU-FILM-Easy |       |              |              |              | SNU-FILM-Medium |       |              |              |               | SNU-FILM-Hard |       |              |              |               | SNU-FILM-Extreme |       |              |              |               |
|---------------|---------------|-------|--------------|--------------|--------------|-----------------|-------|--------------|--------------|---------------|---------------|-------|--------------|--------------|---------------|------------------|-------|--------------|--------------|---------------|
|               | PSNR↑         | SSIM↑ | LPIPS↓       | FloLPIPS↓    | FID↓         | PSNR↑           | SSIM↑ | LPIPS↓       | FloLPIPS↓    | FID↓          | PSNR↑         | SSIM↑ | LPIPS↓       | FloLPIPS↓    | FID↓          | PSNR↑            | SSIM↑ | LPIPS↓       | FloLPIPS↓    | FID↓          |
| BMBC          | 39.809        | 0.990 | 0.020        | 0.031        | 6.162        | 35.437          | 0.978 | 0.034        | 0.059        | 12.272        | 29.942        | 0.933 | 0.068        | 0.118        | 25.773        | 24.715           | 0.856 | 0.145        | 0.237        | 49.519        |
| AdaCoF        | 39.632        | 0.990 | 0.021        | 0.033        | 6.587        | 34.919          | 0.975 | 0.039        | 0.066        | 14.173        | 29.477        | 0.925 | 0.080        | 0.131        | 27.982        | 24.650           | 0.851 | 0.152        | 0.234        | 52.848        |
| CDFI          | 39.881        | 0.990 | 0.019        | 0.031        | 6.133        | 35.224          | 0.977 | 0.036        | 0.066        | 12.906        | 29.660        | 0.929 | 0.081        | 0.141        | 29.087        | 24.645           | 0.854 | 0.163        | 0.255        | 53.916        |
| XVFI          | 38.903        | 0.989 | 0.022        | 0.037        | 7.401        | 34.552          | 0.975 | 0.039        | 0.072        | 16.000        | 29.364        | 0.928 | 0.075        | 0.138        | 29.483        | 24.545           | 0.853 | 0.142        | 0.233        | 54.449        |
| ABME          | 39.697        | 0.990 | 0.022        | 0.034        | 6.363        | 35.280          | 0.977 | 0.042        | 0.076        | 15.159        | 29.643        | 0.929 | 0.092        | 0.168        | 34.236        | 24.541           | 0.853 | 0.182        | 0.300        | 63.561        |
| IFRNet        | 39.881        | 0.990 | 0.019        | 0.030        | 5.939        | 35.668          | 0.979 | 0.033        | 0.058        | 12.084        | 30.143        | 0.935 | 0.065        | 0.122        | <b>25.436</b> | 24.954           | 0.859 | 0.136        | 0.229        | 50.047        |
| ST-MFNet      | <b>40.775</b> | 0.992 | 0.019        | 0.031        | 5.973        | <b>37.111</b>   | 0.984 | 0.036        | 0.061        | <b>11.716</b> | <b>31.698</b> | 0.951 | 0.073        | 0.123        | 25.512        | <b>25.810</b>    | 0.874 | 0.148        | 0.238        | 53.563        |
| FLAVR         | <b>40.161</b> | 0.990 | 0.022        | 0.034        | 6.320        | <b>36.020</b>   | 0.979 | 0.049        | 0.077        | 15.006        | <b>30.577</b> | 0.938 | 0.112        | 0.169        | 34.746        | <b>25.206</b>    | 0.861 | 0.217        | 0.303        | 72.673        |
| MCVD          | 22.201        | 0.828 | 0.199        | 0.230        | 32.246       | 21.488          | 0.812 | 0.213        | 0.243        | 37.474        | 20.314        | 0.766 | 0.250        | 0.292        | 51.529        | 18.464           | 0.694 | 0.320        | 0.385        | 83.156        |
| LDMVFI        | 38.674        | 0.987 | <b>0.014</b> | <b>0.024</b> | <b>5.752</b> | 33.996          | 0.970 | <b>0.028</b> | <b>0.053</b> | 12.485        | 28.547        | 0.917 | <b>0.060</b> | <b>0.114</b> | 26.520        | 23.934           | 0.837 | <b>0.123</b> | <b>0.204</b> | <b>47.042</b> |
| MADIFF w/o MS | 38.690        | 0.988 | <b>0.013</b> | <b>0.021</b> | <b>5.157</b> | 34.183          | 0.974 | <b>0.025</b> | <b>0.048</b> | <b>10.919</b> | 28.774        | 0.923 | <b>0.058</b> | <b>0.110</b> | <b>23.143</b> | 23.861           | 0.841 | 0.125        | 0.210        | 49.435        |
| MADIFF        | 38.644        | 0.988 | <b>0.013</b> | <b>0.021</b> | <b>5.334</b> | 34.255          | 0.973 | <b>0.027</b> | <b>0.049</b> | <b>11.022</b> | 28.961        | 0.923 | <b>0.058</b> | <b>0.107</b> | <b>22.707</b> | 24.150           | 0.847 | <b>0.118</b> | <b>0.198</b> | <b>44.923</b> |

**Table 7: Quantitative comparison results on SNU-FILM (note VFIformer is not included because the GPU goes out of memory). For each column, we highlight the best result in **red** and the second best in **blue**.**

## A.4 Architecture of De-noising U-net

Following [15], we employ the time-conditioned U-Net as in [55] for  $\epsilon_\theta$  and replace all the vanilla self-attention blocks [67] with the MaxViT blocks [64] for computational efficiency. And each encoder layer consists of 2 ResNetBlock, 1 Max Cross-Attention Block, each decoder layer consists of 2 ResNetBlock, 1 Max Cross-Attention Block and a Up-sampling Layer. And the number of attention head is set to 32.

## B MORE RESULTS

### B.1 Quantitative Comparisons

The full evaluation results of MADIFF and the compared VFI methods on all test sets (Middlebury [1], UCF-101 [62], DAVIS [52] and SNU-FILM [10]) in terms of all metrics (PSNR, SSIM [70], LPIPS [77], FloLPIPS [12] and FID [19]) are summarized in Table 6 and Table 7. We observe that, on perceptual-related metrics such as LPIPS, FloLPIPS, and FID, our MADIFF attains state-of-the-art performance when compared to existing VFI methods, encompassing both non-diffusion and diffusion-based approaches. Furthermore, in terms of PSNR and SSIM, our MADIFF demonstrates superior performance compared to existing diffusion-based methods.

### B.2 Qualitative Comparisons

We provide more qualitative comparison results as shown in Figure 4.

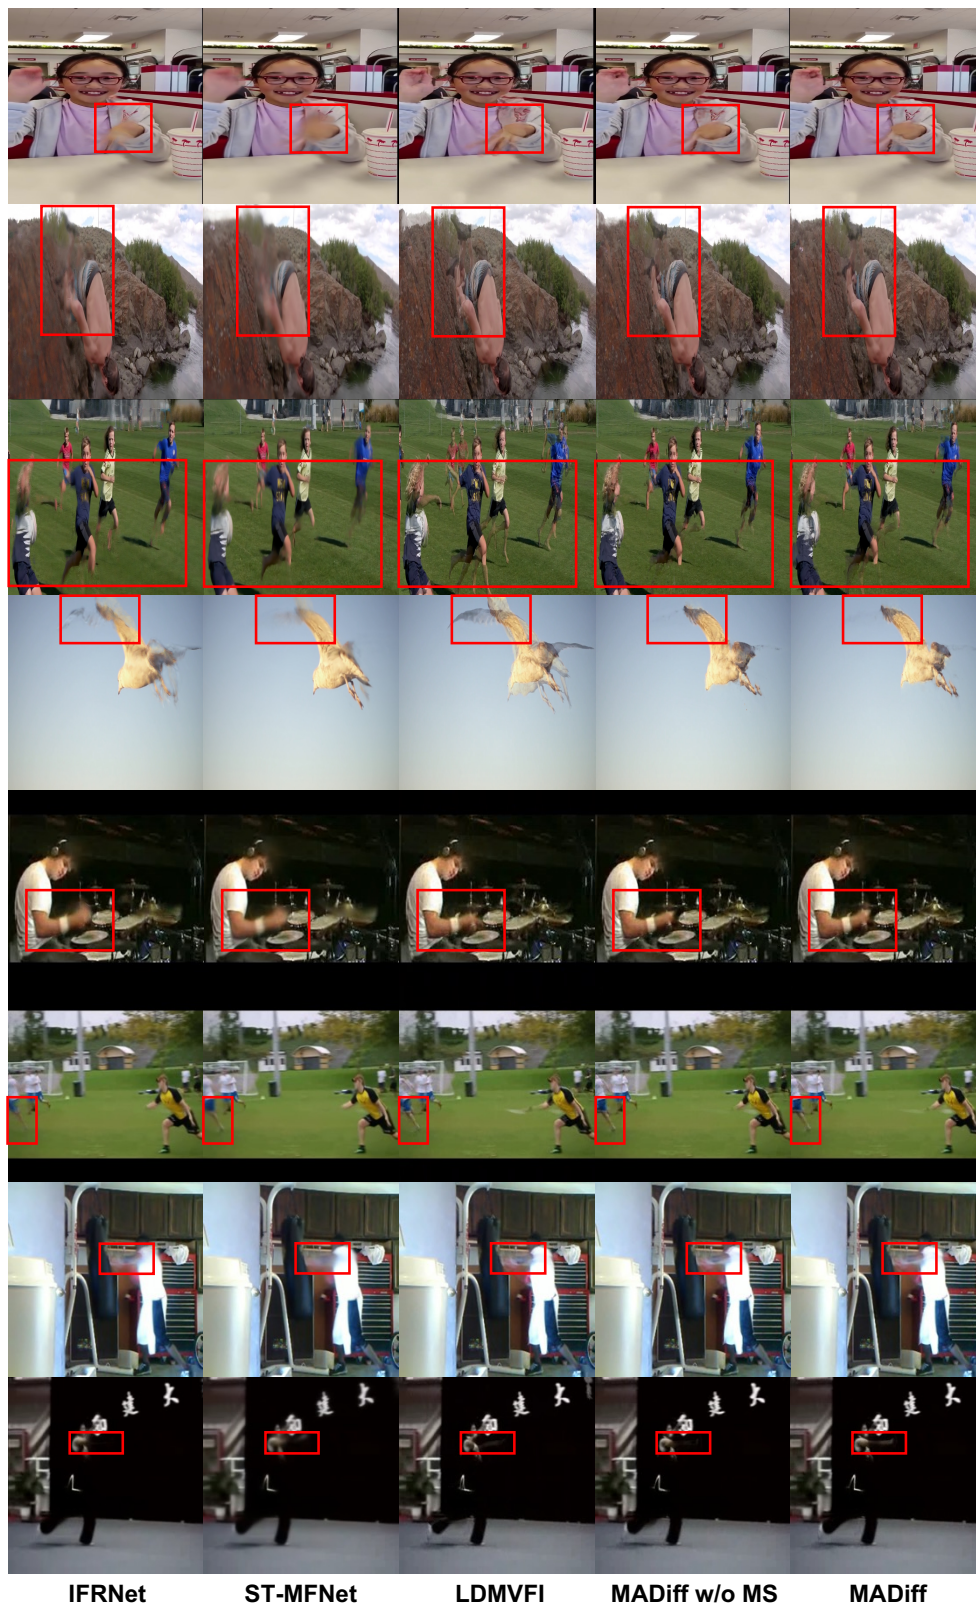

Figure 4: More visual examples of frames interpolated by the state-of-the-art methods and the proposed MADIFF. Under large and complex motions, our method preserves the most high-frequency details, delivering superior perceptual quality.
